# Supplementary material for: Genome-wide Cas9 binding specificity in Saccharomyces cerevisiae
Source: PeerJ. 2020 Jul 29;8:e9442. doi: 10.7717/peerj.9442 (PMC7395602; doi:10.7717/peerj.9442)
Supplement: Data S1 [file peerj-08-9442-s002.xlsx]

## Sheet: Figure 2A Raw data
Fluor	Target	Sample	Cq
GAL1 promoter ARS305-2
SYBR	ACT	WCE A	20.8976			C(t)				ΔC(t)			ΔΔC(t)		2^-ΔΔC(t)		Average fold enrichment	Standard Deviation	Standard Error
SYBR	ACT	WCE A	20.8983				WCE	IP		N1 WCE	Cas9		Cas9		Cas9
SYBR	ACT	WCE A	20.7716			Actin	20.8976	27.22
SYBR	ACT	WCE B	21.2456			Actin	20.8983	27.157
SYBR	ACT	WCE B	21.295			Actin	20.7716	27.1515
SYBR	ACT	WCE B	21.3096		Replicate A ARS305-2 GAL1	ARS305	21.193	17.9086		0.337181	-9.26757		-9.51358		730.927
SYBR	ACT	WCE C	23.0379			ARS305	21.112	17.9231		0.256203	-9.25312		-9.49914		723.643		732.085	9.07551	5.23975
SYBR	ACT	WCE C	23.0263			ARS305	21.0005	17.8875		0.144655	-9.28865		-9.53466		741.683
SYBR	ACT	WCE C	22.8735
SYBR	ACT	IP A	27.22			C(t)				ΔC(t)			ΔΔC(t)		2^-ΔΔC(t)		Average fold enrichment	Standard Deviation	Standard Error
SYBR	ACT	IP A	27.157				WCE	IP		N1 WCE	Cas9		Cas9		Cas9
SYBR	ACT	IP A	27.1515			Actin	21.2456	26.4852
SYBR	ACT	IP B	26.4852			Actin	21.295	26.3643
SYBR	ACT	IP B	26.3643			Actin	21.3096	26.212
SYBR	ACT	IP B	26.212		Replicate B ARS305-2 GAL1	ARS305	21.6562	18.2127		0.372847	-8.14108		-8.547		374.028
SYBR	ACT	IP C	26.1552			ARS305	21.7676	18.1428		0.484249	-8.21098		-8.6169		392.596		404.26	37.451	21.6223
SYBR	ACT	IP C	26.2411			ARS305	21.6441	17.9583		0.360684	-8.39547		-8.8014		446.154
SYBR	ACT	IP C	26.2611
SYBR	305-2	WCE A	21.193			C(t)				ΔC(t)			ΔΔC(t)		2^-ΔΔC(t)		Average fold enrichment	Standard Deviation	Standard Error
SYBR	305-2	WCE A	21.112				WCE	IP		N1 WCE	Cas9		Cas9		Cas9
SYBR	305-2	WCE A	21.0005			Actin	23.0379	26.1552
SYBR	305-2	WCE B	21.6562			Actin	23.0263	26.2411
SYBR	305-2	WCE B	21.7676			Actin	22.8735	26.2611
SYBR	305-2	WCE B	21.6441		Replicate C ARS305-2 GAL1	ARS305	23.1291	18.049		0.14987	-8.17007		-8.30507		316.283
SYBR	305-2	WCE C	23.1291			ARS305	23.1857	18.0828		0.20646	-8.13628		-8.27128		308.96		336.996	42.3766	24.4661
SYBR	305-2	WCE C	23.1857			ARS305	23.0279	17.7626		0.0486725	-8.4565		-8.59151		385.745
SYBR	305-2	WCE C	23.0279
SYBR	305-2	IP A	17.9086
SYBR	305-2	IP A	17.9231
SYBR	305-2	IP A	17.8875			C(t)				ΔC(t)			ΔΔC(t)		2^-ΔΔC(t)		Average fold enrichment	Standard Deviation	Standard Error
SYBR	305-2	IP B	18.2127				WCE	IP		N1 WCE	Cas9		Cas9		Cas9
SYBR	305-2	IP B	18.1428			Actin	19.4376	25.9996
SYBR	305-2	IP B	17.9583			Actin	19.396	26.1875
SYBR	305-2	IP C	18.049			Actin	19.3824	26.0693
SYBR	305-2	IP C	18.0828		Replicate A ARS305-1 GAL1	ARS305	19.3505	17.8892		-0.0548538	-8.19622		-8.10834		275.964
SYBR	305-2	IP C	17.7626			ARS305	19.283	17.8071		-0.122304	-8.27837		-8.19049		292.134		288.256	10.8844	6.2841
						ARS305	19.3188	17.7849		-0.0864845	-8.3006		-8.21272		296.671
GAL1 promoter ARS305-1
SYBR	ACT	WCE WT A	19.4376			C(t)				ΔC(t)			ΔΔC(t)		2^-ΔΔC(t)		Average fold enrichment	Standard Deviation	Standard Error
SYBR	ACT	WCE WT A	19.396				WCE	IP		N1 WCE	Cas9		Cas9		Cas9
SYBR	ACT	WCE WT A	19.3824			Actin	20.3129	26.8807
SYBR	ACT	WCE WT B	20.3129			Actin	20.3062	26.7693
SYBR	ACT	WCE WT B	20.3062			Actin	20.3126	26.7582
SYBR	ACT	WCE WT B	20.3126		Replicate B ARS305-1 GAL1	ARS305	20.1161	18.3126		-0.194455	-8.49011		-8.38804		335.005
SYBR	ACT	WCE WT C	20.6941			ARS305	20.0912	18.2744		-0.219331	-8.52835		-8.42628		344.004		344.427	9.64141	5.56647
SYBR	ACT	WCE WT C	20.7139			ARS305	20.4181	18.2319		0.107579	-8.57079		-8.46872		354.274
SYBR	ACT	WCE WT C	20.5592
SYBR	ACT	IP WT A	25.9996			C(t)				ΔC(t)			ΔΔC(t)		2^-ΔΔC(t)		Average fold enrichment	Standard Deviation	Standard Error
SYBR	ACT	IP WT A	26.1875				WCE	IP		N1 WCE	Cas9		Cas9		Cas9
SYBR	ACT	IP WT A	26.0693			Actin	20.6941	25.8306
SYBR	ACT	IP WT B	26.8807			Actin	20.7139	25.8284
SYBR	ACT	IP WT B	26.7693			Actin	20.5592	26.0977
SYBR	ACT	IP WT B	26.7582		Replicate C ARS305-1 GAL1	ARS305	20.5586	17.3992		-0.0971458	-8.51974		-8.35379		327.146
SYBR	ACT	IP WT C	25.8306			ARS305	20.4833	17.3028		-0.172428	-8.61605		-8.4501		349.73		339.554	11.4564	6.61436
SYBR	ACT	IP WT C	25.8284			ARS305	20.4274	17.336		-0.228269	-8.58289		-8.41694		341.785
SYBR	ACT	IP WT C	26.0977
SYBR	305-1	WCE WT A	19.3505
SYBR	305-1	WCE WT A	19.283			C(t)				ΔC(t)			ΔΔC(t)		2^-ΔΔC(t)		Average fold enrichment	Standard Deviation	Standard Error
SYBR	305-1	WCE WT A	19.3188				WCE	IP		N1 WCE	Cas9		Cas9		Cas9
SYBR	305-1	WCE WT B	20.1161			Actin	19.2384	25.1839
SYBR	305-1	WCE WT B	20.0912			Actin	20.0888	25.2242
SYBR	305-1	WCE WT B	20.4181			Actin	19.1971	25.106
SYBR	305-1	WCE WT C	20.5586		Replicate A ADH1 promoter ARS305-1	ARS305	20.933	17.7044		1.42496	-7.467		-7.94428		246.302
SYBR	305-1	WCE WT C	20.4833			ARS305	19.765	17.615		0.256919	-7.55641		-8.0337		262.05		249.476	11.3263	6.53926
SYBR	305-1	WCE WT C	20.4274			ARS305	19.2581	17.7413		-0.25002	-7.43005		-7.90734		240.075
SYBR	305-1	IP WT A	17.8892
SYBR	305-1	IP WT A	17.8071			C(t)				ΔC(t)			ΔΔC(t)		2^-ΔΔC(t)		Average fold enrichment	Standard Deviation	Standard Error
SYBR	305-1	IP WT A	17.7849				WCE	IP		N1 WCE	Cas9		Cas9		Cas9
SYBR	305-1	IP WT B	18.3126			Actin	17.6267	24.1363
SYBR	305-1	IP WT B	18.2744			Actin	17.5945	24.1393
SYBR	305-1	IP WT B	18.2319			Actin	17.7246	24.0712
SYBR	305-1	IP WT C	17.3992		Replicate B ADH1 promoter ARS305-1	ARS305	17.6828	16.7623		0.0341615	-7.35333		-7.29295		156.818
SYBR	305-1	IP WT C	17.3028			ARS305	17.5875	16.9175		-0.0611342	-7.19812		-7.13775		140.824		146.82	8.71589	5.03212
SYBR	305-1	IP WT C	17.336			ARS305	17.4945	16.8972		-0.154162	-7.21842		-7.15804		142.819
ADH1 promoter ARS305-1						C(t)				ΔC(t)			ΔΔC(t)		2^-ΔΔC(t)		Average fold enrichment	Standard Deviation	Standard Error
SYBR	ACT	A	25.1839				WCE	IP		N1 WCE	Cas9		Cas9		Cas9
SYBR	ACT	A	25.2242			Actin	18.9944	24.3471
SYBR	ACT	A	25.106			Actin	18.9629	24.3266
SYBR	ACT	B	24.1363			Actin	18.823	24.4302
SYBR	ACT	B	24.1393		Replicate C ADH1 promoter ARS305-1	ARS305	18.4925	16.711		-0.43427	-7.65695		-7.16787		143.795
SYBR	ACT	B	24.0712			ARS305	18.4995	16.5896		-0.427294	-7.77835		-7.28926		156.418		152.587	7.63559	4.40841
SYBR	ACT	C	24.3471			ARS305	18.3211	16.5792		-0.605681	-7.78874		-7.29966		157.549
SYBR	ACT	C	24.3266
SYBR	ACT	C	24.4302
SYBR	ACT	WCE A	19.2384
SYBR	ACT	WCE A	20.0888
SYBR	ACT	WCE A	19.1971
SYBR	ACT	WCE B	17.6267
SYBR	ACT	WCE B	17.5945
SYBR	ACT	WCE B	17.7246
SYBR	ACT	WCE C	18.9944
SYBR	ACT	WCE C	18.9629
SYBR	ACT	WCE C	18.823
SYBR	305-1	A	17.7044
SYBR	305-1	A	17.615
SYBR	305-1	A	17.7413
SYBR	305-1	B	16.7623
SYBR	305-1	B	16.9175
SYBR	305-1	B	16.8972
SYBR	305-1	C	16.711
SYBR	305-1	C	16.5896
SYBR	305-1	C	16.5792
SYBR	305-1	WCE A	20.933
SYBR	305-1	WCE A	19.765
SYBR	305-1	WCE A	19.2581
SYBR	305-1	WCE B	17.6828
SYBR	305-1	WCE B	17.5875
SYBR	305-1	WCE B	17.4945
SYBR	305-1	WCE C	18.4925
SYBR	305-1	WCE C	18.4995
SYBR	305-1	WCE C	18.3211

## Sheet: Figure 2A compile
Sample Name	Abbrev. Sample Name	Average fold enrichment	Mean Enrichment	St. Deviation	St. Error
Replicate A ARS305-2 Raffinose		732.085
Replicate B ARS305-2 Raffinose	ARS305-2 GAL1 WT dCas9	404.26	491.113	211.38	122.04
Replicate C ARS305-2 Raffinose		336.996
Replicate A ADH1 promoter ARS305-1		249.476
Replicate B ADH1 promoter ARS305-1	ARS305-1 ADH1	146.82	182.961	57.6753	33.2989
Replicate C ADH1 promoter ARS305-1		152.587
Replicate A ARS305-1 Raffinose		288.256
Replicate A ARS305-1 Raffinose	ARS305-1 GAL1 WT dCas9	344.427	324.079	31.119	17.9666
Replicate A ARS305-1 Raffinose		339.554
Sample	Average fold-enrichment	Standard error
ARS305-1 ADH1 dCas9	182.961	33.2989
ARS305-1 GAL1 dCas9	324.079	17.9666
ARS305-2 GAL1 dCas9	491.113	122.04

## Sheet: Figure 2B Raw data
Cas9	Fluor	Target	Sample	Cq
edCas91.1	SYBR	ACT	IP1	28.2208			C(t)				ΔC(t)			ΔΔC(t)		2^-ΔΔC(t)		Average fold enrichment	Standard Deviation	Standard Error
	SYBR	ACT	IP1	28.2508	edCas91.1			WCE	IP		N1 WCE	Cas9		Cas9		Cas9
	SYBR	ACT	IP1	28.2051			Actin	19.0446	28.2208
	SYBR	ACT	IP2	28.215			Actin	18.9526	28.2508
	SYBR	ACT	IP2	28.2089		IP 1	Actin	18.995	28.2051
	SYBR	ACT	IP2	28.18			ARS305	18.7788	19.9505		-0.218645	-8.27507		-7.9903		254.285
	SYBR	ACT	IP3	28.6616			ARS305	18.7011	19.9305		-0.296345	-8.29506		-8.01029		257.833		255.464	2.05161	1.18449
	SYBR	ACT	IP3	28.4697			ARS305	18.6581	19.9505		-0.339323	-8.27501		-7.99024		254.274
	SYBR	ACT	IP3	28.5486
	SYBR	ACT	WCE IP1	19.0446			C(t)				ΔC(t)			ΔΔC(t)		2^-ΔΔC(t)		Average fold enrichment	Standard Deviation	Standard Error
	SYBR	ACT	WCE IP1	18.9526				WCE	IP		N1 WCE	Cas9		Cas9		Cas9
	SYBR	ACT	WCE IP1	18.995			Actin	19.0159	28.215
	SYBR	ACT	WCE IP2	19.0159			Actin	19.0434	28.2089
	SYBR	ACT	WCE IP2	19.0434		IP 2	Actin	18.9341	28.18
	SYBR	ACT	WCE IP2	18.9341			ARS305	18.7575	19.8801		-0.240295	-8.32122		-8.07022		268.768
	SYBR	ACT	WCE IP3	18.679			ARS305	18.7076	19.8505		-0.290213	-8.35076		-8.09975		274.327		269.998	3.86376	2.23074
	SYBR	ACT	WCE IP3	18.606			ARS305	18.7753	19.8901		-0.222513	-8.31116		-8.06015		266.899
	SYBR	ACT	WCE IP3	18.5592
	SYBR	Red primer set	IP1	19.9505			C(t)				ΔC(t)			ΔΔC(t)		2^-ΔΔC(t)		Average fold enrichment	Standard Deviation	Standard Error
	SYBR	Red primer set	IP1	19.9305				WCE	IP		N1 WCE	Cas9		Cas9		Cas9
	SYBR	Red primer set	IP1	19.9505			Actin	18.679	28.6616
	SYBR	Red primer set	IP2	19.8801			Actin	18.606	28.4697
	SYBR	Red primer set	IP2	19.8505		IP 3	Actin	18.5592	28.5486
	SYBR	Red primer set	IP2	19.8901			ARS305	18.3673	20.0065		-0.247416	-8.55351		-8.30275		315.774
	SYBR	Red primer set	IP3	20.0065			ARS305	18.3779	20.0621		-0.236827	-8.49789		-8.24713		303.831		315.32	11.2692	6.50628
	SYBR	Red primer set	IP3	20.0621			ARS305	18.3467	19.9589		-0.268048	-8.60106		-8.3503		326.356
	SYBR	Red primer set	IP3	19.9589
	SYBR	Red primer set	WCE IP1	18.7788
	SYBR	Red primer set	WCE IP1	18.7011
	SYBR	Red primer set	WCE IP1	18.6581
	SYBR	Red primer set	WCE IP2	18.7575
	SYBR	Red primer set	WCE IP2	18.7076
	SYBR	Red primer set	WCE IP2	18.7753
	SYBR	Red primer set	WCE IP3	18.3673
	SYBR	Red primer set	WCE IP3	18.3779
	SYBR	Red primer set	WCE IP3	18.3467
dCas9	SYBR	ACT	IP1	27.6904	dCas9		C(t)				ΔC(t)			ΔΔC(t)		2^-ΔΔC(t)		Average fold enrichment	Standard Deviation	Standard Error
	SYBR	ACT	IP1	27.8778				WCE	IP		N1 WCE	Cas9		Cas9		Cas9
	SYBR	ACT	IP1	27.875			Actin	18.5528	27.6904
	SYBR	ACT	IP2	27.2225			Actin	18.5506	27.8778
	SYBR	ACT	IP2	27.1648		IP 1	Actin	18.4275	27.875
	SYBR	ACT	IP2	27.2119			ARS305	18.322	20.2301		-0.188308	-7.5843		-7.37498		165.993
	SYBR	ACT	IP3	27.4828			ARS305	18.2992	20.2089		-0.211064	-7.6055		-7.39618		168.451		166.155	2.21865	1.28094
	SYBR	ACT	IP3	27.4377			ARS305	18.2817	20.2473		-0.228594	-7.56707		-7.35775		164.022
	SYBR	ACT	IP3	27.4544
	SYBR	ACT	WCE IP1	18.5528			C(t)				ΔC(t)			ΔΔC(t)		2^-ΔΔC(t)		Average fold enrichment	Standard Deviation	Standard Error
	SYBR	ACT	WCE IP1	18.5506				WCE	IP		N1 WCE	Cas9		Cas9		Cas9
	SYBR	ACT	WCE IP1	18.4275			Actin	18.1055	27.2225
	SYBR	ACT	WCE IP2	18.1055			Actin	17.9724	27.1648
	SYBR	ACT	WCE IP2	17.9724		IP 2	Actin	17.9277	27.2119
	SYBR	ACT	WCE IP2	17.9277			ARS305	17.4988	20.0389		-0.503103	-7.16087		-6.60113		97.0821
	SYBR	ACT	WCE IP3	18.6434			ARS305	17.4306	20.0098		-0.571224	-7.18993		-6.63019		99.0574		100.179	3.78509	2.18532
	SYBR	ACT	WCE IP3	18.5972			ARS305	17.397	19.934		-0.60488	-7.26569		-6.70596		104.399
	SYBR	ACT	WCE IP3	18.5703
	SYBR	Red primer set	IP1	20.2301			C(t)				ΔC(t)			ΔΔC(t)		2^-ΔΔC(t)		Average fold enrichment	Standard Deviation	Standard Error
	SYBR	Red primer set	IP1	20.2089				WCE	IP		N1 WCE	Cas9		Cas9		Cas9
	SYBR	Red primer set	IP1	20.2473			Actin	18.6434	27.4828
	SYBR	Red primer set	IP2	20.0389			Actin	18.5972	27.4377
	SYBR	Red primer set	IP2	20.0098		IP 3	Actin	18.5703	27.4544
	SYBR	Red primer set	IP2	19.934			ARS305	18.3595	20.1471		-0.244085	-7.31115		-7.04411		131.974
	SYBR	Red primer set	IP3	20.1471			ARS305	18.3285	20.081		-0.275109	-7.3773		-7.11025		138.166		135.534	3.1986	1.84671
	SYBR	Red primer set	IP3	20.081			ARS305	18.3217	20.0989		-0.281944	-7.35941		-7.09237		136.463
	SYBR	Red primer set	IP3	20.0989
	SYBR	Red primer set	WCE IP1	18.322
	SYBR	Red primer set	WCE IP1	18.2992
	SYBR	Red primer set	WCE IP1	18.2817
	SYBR	Red primer set	WCE IP2	17.4988		Cas9	Replicate	Fold-enrichment	Average of replicates	Standard Deviation	Standard Error
	SYBR	Red primer set	WCE IP2	17.4306		WT dCas9	IP 1	166.155	133.956
	SYBR	Red primer set	WCE IP2	17.397			IP 2	100.179		33.0163	19.0619
	SYBR	Red primer set	WCE IP3	18.3595			IP 3	135.534
	SYBR	Red primer set	WCE IP3	18.3285		edCas9 (1.1)	IP 1	255.464	280.261
	SYBR	Red primer set	WCE IP3	18.3217			IP 2	269.998		31.2199	18.0248
							IP 3	315.32
								dCas9	134
								edCas9 (1.1)	280
